# Supplementary material for: Exosomes Derived from Stem Cells from Apical Papilla Ameliorate Sjogren's Syndrome by Suppressing Th17 Cell Differentiation
Source: Research Square preprint supplement (doi:10.21203/rs.3.rs-864685/v1), 2021-09-08
Supplement: Supplementary file 1 [file 3a2b4cda650a3d2ff68d59b5.pdf]

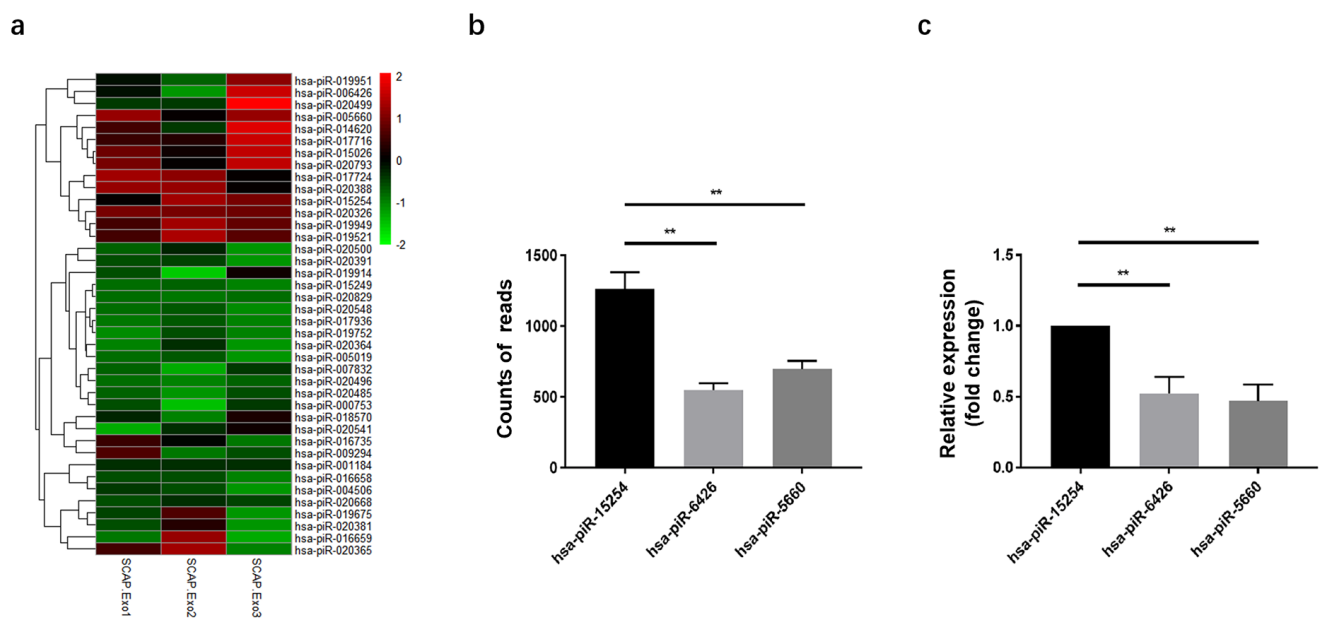

**Supplementary Figure 1. Hsa-piR-15254 was highly expressed in SCAP-Exo.** **a** Heatmap of top 40 piRNAs in SCAP-Exo. Each row represents a piRNA and each column represents a sample. The colour scale shown in the map indicates the expression levels of piRNAs across all samples: red represent high expression levels and green represent lower expression levels. **b** Sequencing results showed that the reads of hsa-piR-15254 were higher than hsa-piR-5660 and hsa-piR-6426 in SCAP-Exo. **c** qRT-PCR results showed that the level of hsa-piR-15254 was higher than hsa-piR-5660 and hsa-piR-6426 in SCAP-Exo.  $n = 3$  in each group.  $**P < 0.01$ . Error bars: mean  $\pm$  SD.
